# Supplementary material for: Silver Dendritic Gels with Luminescence and Aggregation-Induced Emission Effect
Source: MDPI journal article supplement (doi:10.3390/gels10050291), 2024-04-24
Supplement: s1 [file s1]

## Supplementary Materials:

# Silver Dendritic Gels with Luminescence and AIE effect

Verónica Iguarbe <sup>1</sup>, Pilar Romero <sup>1</sup>, Anabel Elduque <sup>2,\*</sup> and Raquel Giménez <sup>1,\*</sup>

<sup>1</sup> Instituto de Nanociencia y Materiales de Aragón (INMA), CSIC-Universidad de Zaragoza, 50009 Zaragoza, Spain.

<sup>2</sup> Departamento de Química Orgánica, Facultad de Ciencias, Universidad de Zaragoza, 50009 Zaragoza, Spain.

<sup>3</sup> Instituto de Síntesis Química y Catálisis Homogénea (ISQCH), CSIC-Universidad de Zaragoza, 50009 Zaragoza, Spain

<sup>4</sup> Departamento de Química Inorgánica, Facultad de Ciencias, Universidad de Zaragoza, 50009 Zaragoza, Spain.

\* Correspondence: anaelduq@unizar.es (A.E.); rgimenez@unizar.es (R.G.)

| Index                                   | Page |
|-----------------------------------------|------|
| Figure S1.                              | 2    |
| Figure S2                               | 3    |
| Figure S3                               | 4    |
| Figure S4                               | 5    |
| Figure S5                               | 6    |
| Calculation of the association constant | 7    |
| Figure S6                               | 7    |

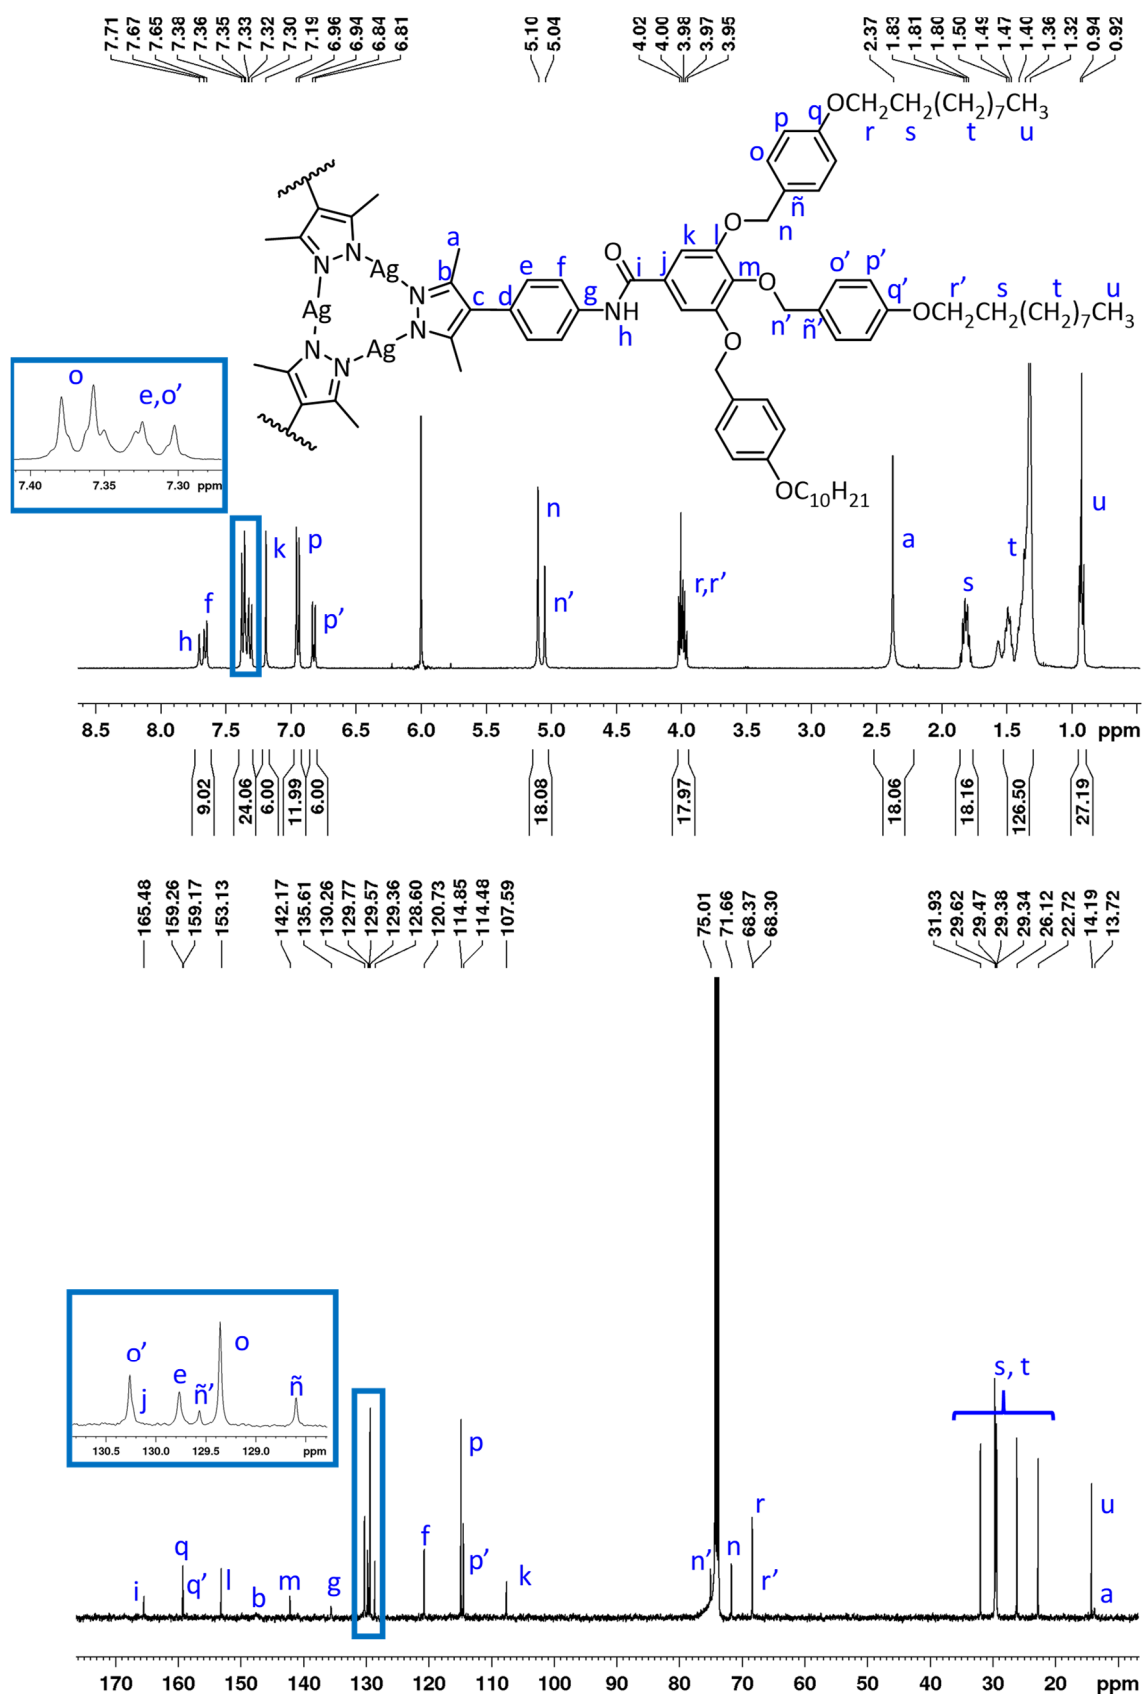

**Figure S1.** <sup>1</sup>H-NMR (400 MHz, C<sub>2</sub>D<sub>2</sub>Cl<sub>4</sub>, 60 °C) and <sup>13</sup>C-NMR (100 MHz, C<sub>2</sub>D<sub>2</sub>Cl<sub>4</sub>, 60 °C) spectra of [Ag(μ-(4-3,4,5)-10G2-APz)]<sub>3</sub>.

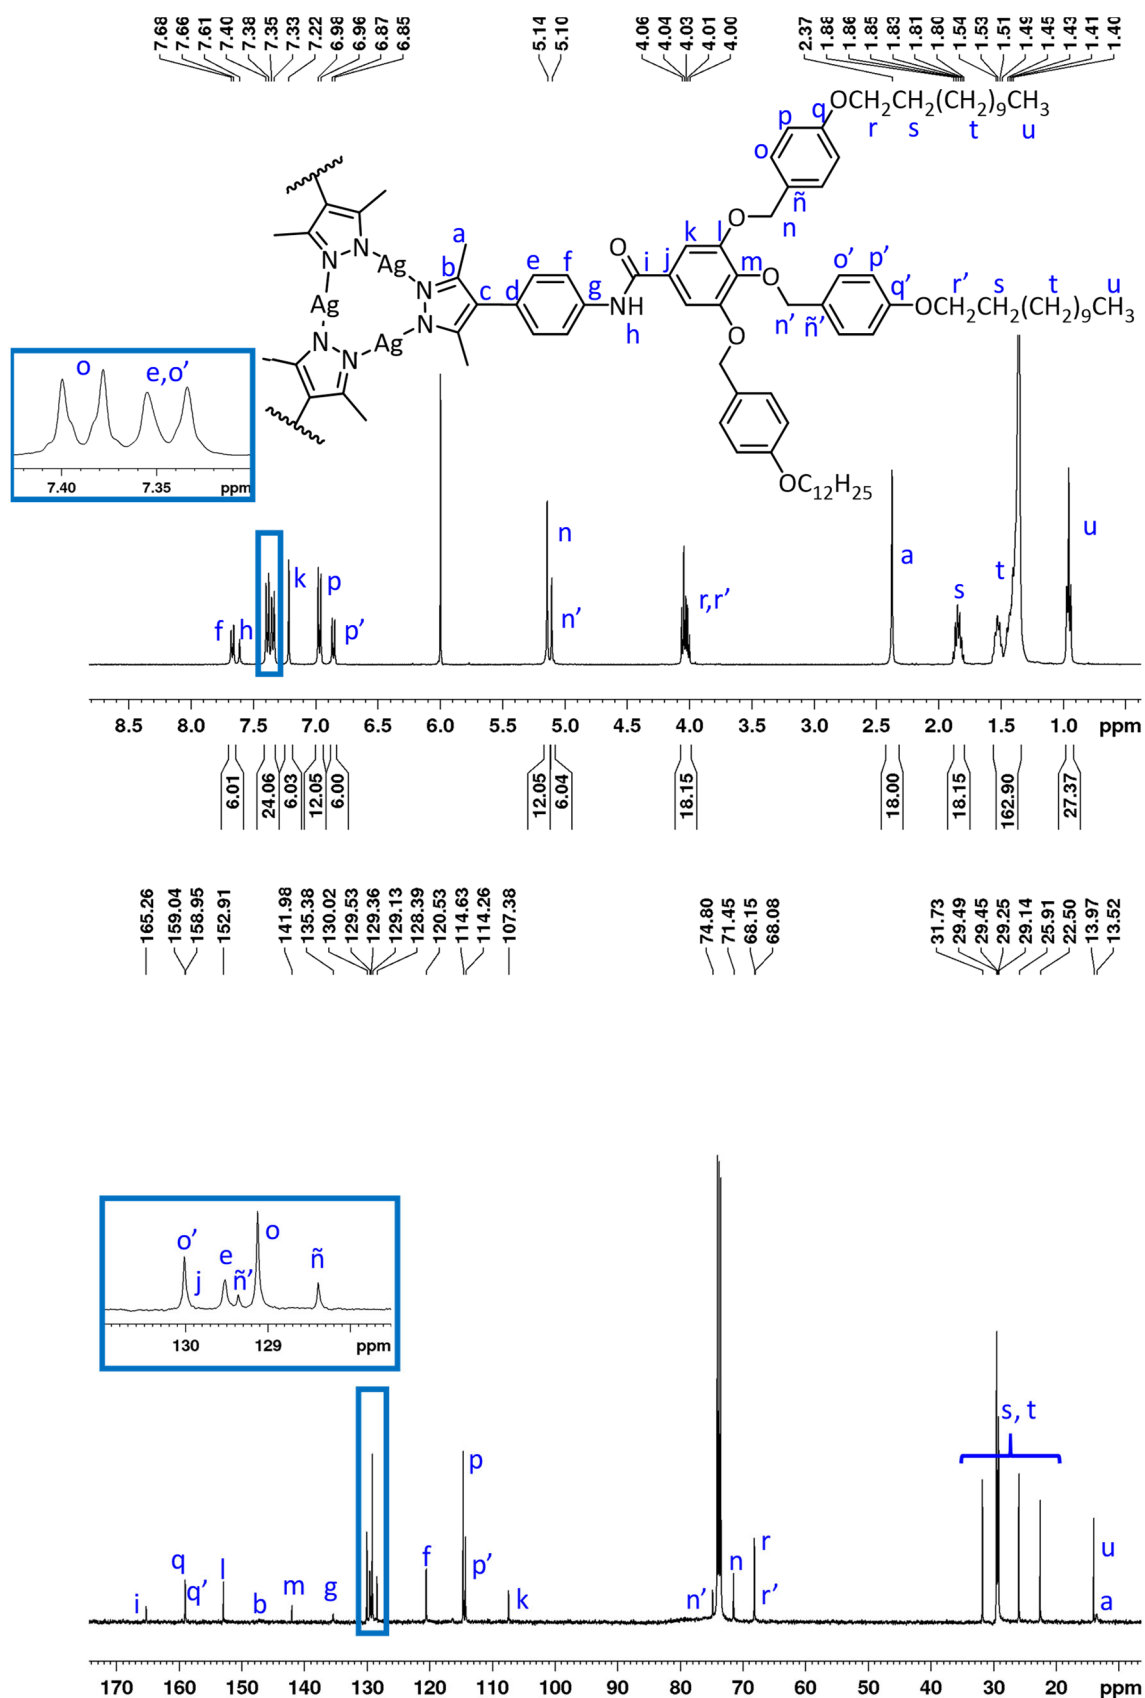

**Figure S2.** <sup>1</sup>H-NMR (400 MHz, C<sub>2</sub>D<sub>2</sub>Cl<sub>4</sub>, 60 °C) and <sup>13</sup>C-NMR (100 MHz, C<sub>2</sub>D<sub>2</sub>Cl<sub>4</sub>, 60 °C) spectra of [Ag(μ-(4-3,4,5)-12G2-APz)]<sub>3</sub>.

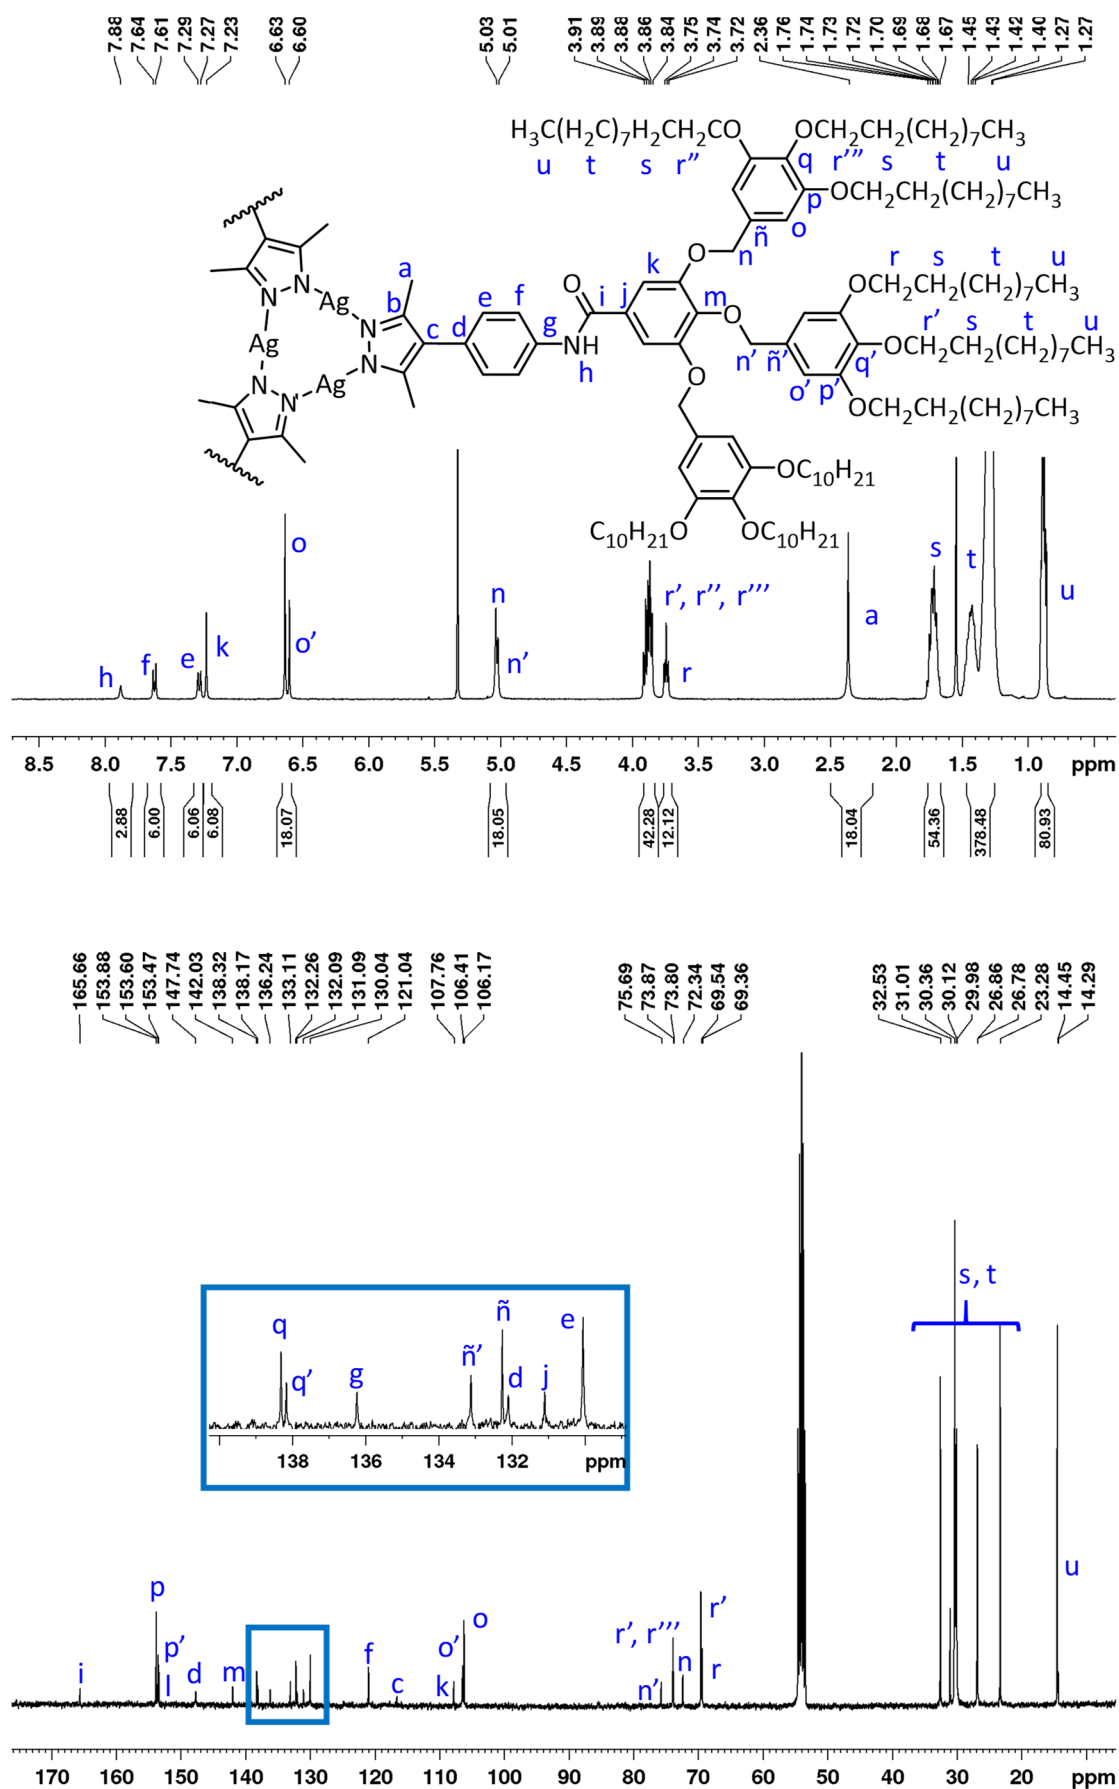

**Figure S3.** <sup>1</sup>H-NMR (400 MHz, CD<sub>2</sub>Cl<sub>2</sub>, 25 °C) and <sup>13</sup>C-NMR (100 MHz, CD<sub>2</sub>Cl<sub>2</sub>, 25 °C) spectra of [Ag(μ-(3,4,5-3,4,5)-10G2-APz)]<sub>3</sub>.

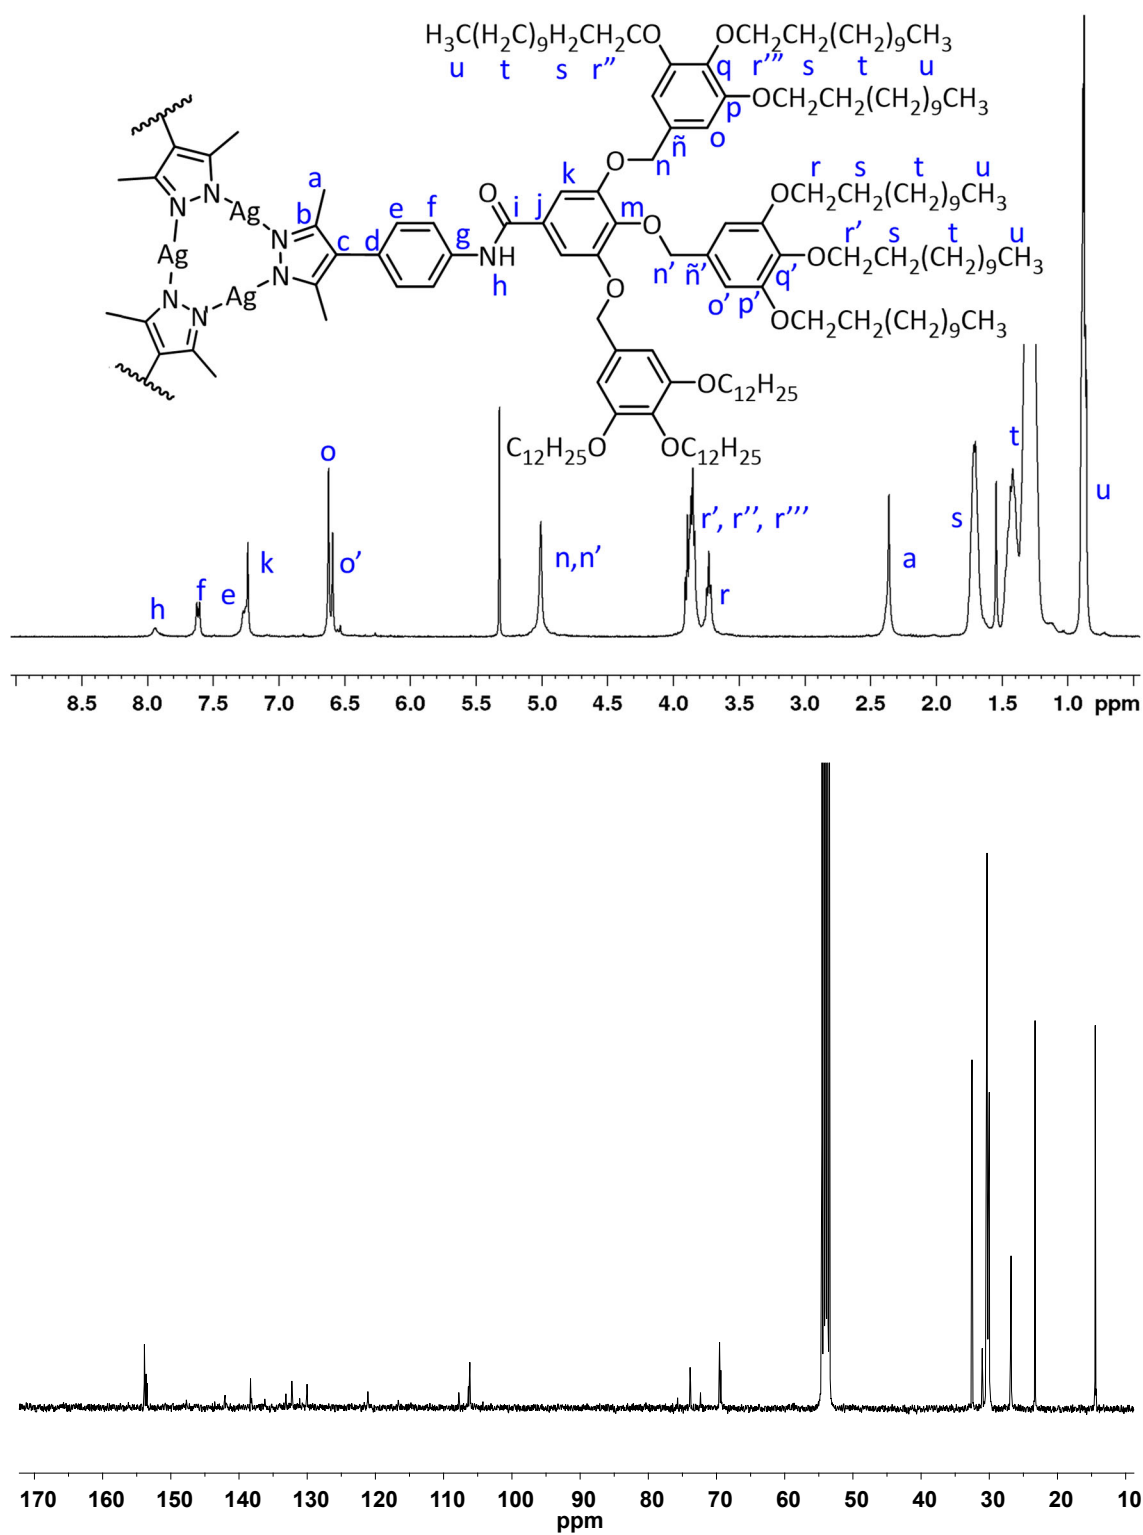

**Figure S4.**  $^1\text{H}$ -NMR (400 MHz, CD<sub>2</sub>Cl<sub>2</sub>, 25 °C) and  $^{13}\text{C}$ -NMR (100 MHz, CD<sub>2</sub>Cl<sub>2</sub>, 25 °C) spectra of  $[\text{Ag}(\mu\text{-(3,4,5-3,4,5)-12G2-APz})]_3$ .

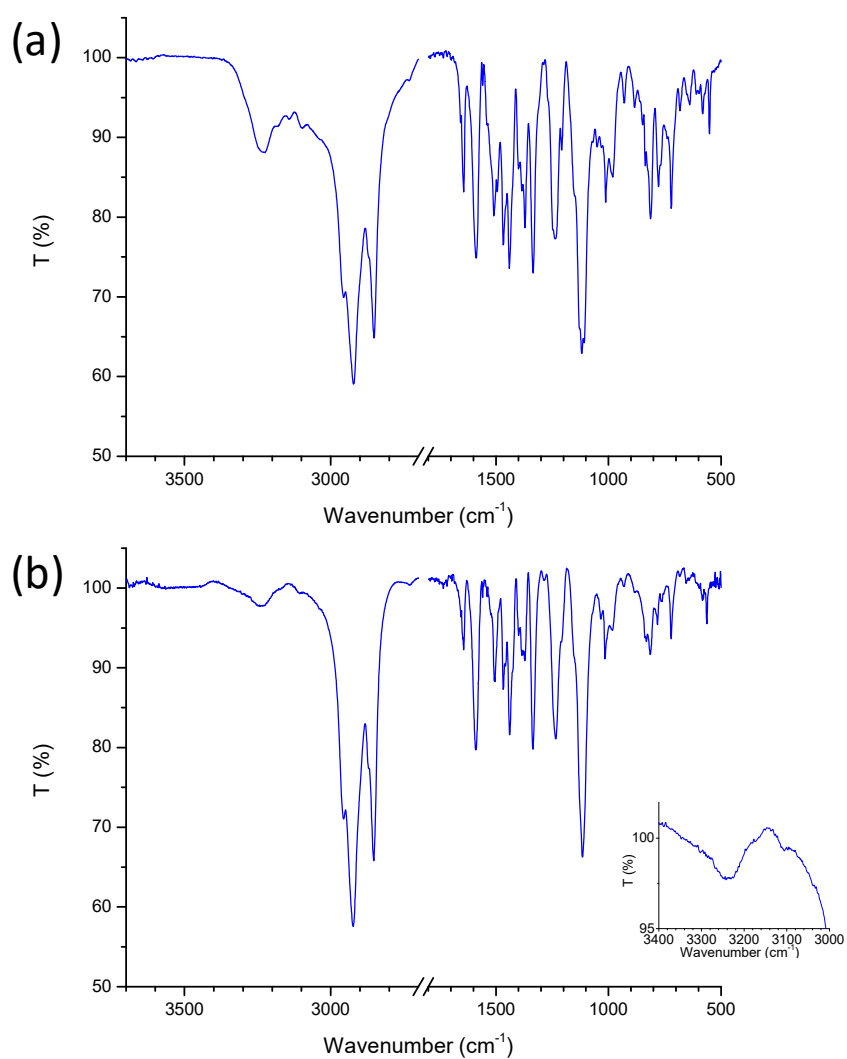

**Figure S5.** FTIR spectra in KBr pellets for (a) ligand precursor **3,4,5-3,4,5-10G2-APzH** and (b) their corresponding metallodendrimer **[Ag(μ-(3,4,5-3,4,5)-10G2-APz)]<sub>3</sub>**.

### Calculation of the association constant

Curve fitting was performed using nonlinear regression analysis (OriginPro 2020b, version 9.7 (Academic) by OriginLab Corporation) assuming the isodesmic model according to the equation:

$$\delta_{obs} = \delta_m + (\delta_{ag} - \delta_m) \left( 1 + \frac{(1 - \sqrt{4KC_T + 1})}{2KC_T} \right)$$

in which K is the association constant,  $C_T$  is the total concentration,  $\delta_{obs}$  is the measured chemical shift at concentration  $C_T$ ,  $\delta_m$  and  $\delta_{ag}$  are limiting chemical shifts of monomer and the aggregate, respectively. Values and curve fitting obtained for three signals were as follows:

| Signal               | NH (H <sub>h</sub> ) | H <sub>k</sub>    | H <sub>a</sub>    |
|----------------------|----------------------|-------------------|-------------------|
| K (M <sup>-1</sup> ) | 142.69861±19.6257    | 142.69861±19.6257 | 142.69861±19.6257 |
| R-square             | 0.99368              | 0.99186           | 0.9963            |

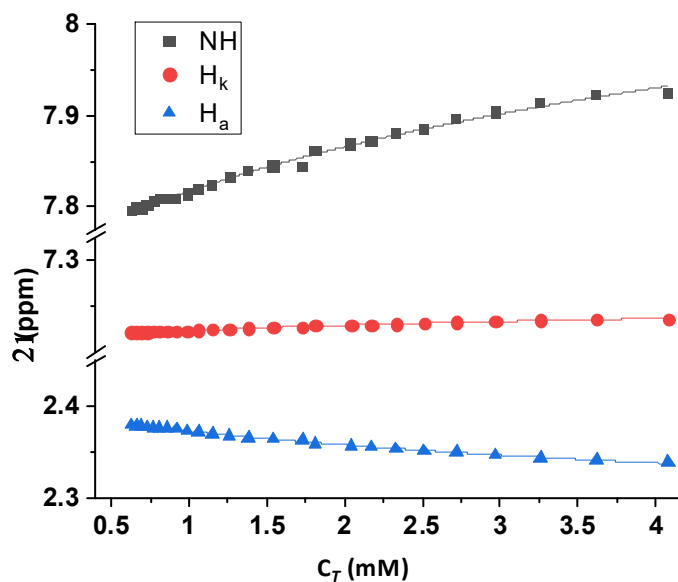

**Figure S6.** Concentration dependence of NMR chemical shifts of the H<sub>h</sub>, H<sub>k</sub> and H<sub>a</sub> signals for [Ag(μ-(3,4,5-3,4,5)-10G2-APz)]<sub>3</sub> in CD<sub>2</sub>Cl<sub>2</sub>. Refer to Figure 5 or Figure S3 for proton assignment.
